# Supplementary material for: Immune checkpoint inhibitors and type 1 diabetes mellitus: a case report and systematic review
Source: PubMed Central journal article supplement (PMC6709545; doi:10.1530/eje-19-0291), 2019-07-19
Supplement: supplementary_table_1.pdf [file supplementary_table_1.pdf]

## Supplemental Table 1. Search terms

### 1. PubMed search terms

("ipilimumab"[Supplementary Concept] OR ipilimumab\*[tw] OR "tremelimumab"[Supplementary Concept] OR ticilimumab\*[tiab] OR tremelimumab\*[tw] OR "pembrolizumab"[Supplementary Concept] OR pembrolizumab\*[tw] OR "nivolumab"[Supplementary Concept] OR nivolumab\*[tw] OR "atezolizumab"[Supplementary Concept] OR atezolizumab\*[tw] OR "avelumab"[Supplementary Concept] OR avelumab\*[tw] OR "durvalumab"[Supplementary Concept] OR durvalumab\*[tw]) AND ("Diabetes Mellitus"[Mesh:NoExp] OR diabet\*[tiab] OR "Diabetes Mellitus, Type 1"[Mesh] OR ("type1"[ti] OR "typeI"[ti] OR "type 1"[ti] OR "type I"[ti] OR type one\*[ti]) AND diabet\*[ti] OR t-1-d-m\*[ti] OR t-I-d-m\*[ti] OR t-1-dm\*[ti] OR t-I-dm\*[ti] OR t1-dm\*[ti] OR tI-dm\*[ti] OR t1dm\*[ti] OR tIdm\*[ti] OR "t1 d"[ti] OR "tI d"[ti] OR "t1d"[ti] OR "tId"[ti] OR t-1-diabet\*[tiab] OR t-I-diabet\*[tiab] OR t1 diabet\*[tiab] OR tI diabet\*[tiab] OR type 1 diabet\*[tiab] OR type I diabet\*[tiab] OR type one diabet\*[tiab] OR type1 diabet\*[tiab] OR typeI-diabet\*[tiab] OR diabetes-type1\*[tiab] OR diabetes-typeI\*[tiab] OR diabetes type 1\*[tiab] OR "diabetes type I"[tiab] OR diabetes-type-one\*[tiab] OR "diabetes mellitus 1"[tiab] OR "diabetes mellitus I"[tiab] OR diabetes mellitus type1\*[tiab] OR "diabetes mellitus typeI"[tiab] OR diabetes mellitus type 1\*[tiab] OR "diabetes mellitus type I"[tiab] OR diabetes mellitus type one\*[tiab] OR dm-type1\*[tiab] OR "dm-typeI"[tiab] OR dm type 1\*[tiab] OR "dm type I"[tiab] OR dm-type-one\*[tiab] OR iddm\*[ti] OR ((insulin depend\*[tiab] OR insulindepend\*[tiab]) AND (diabet\*[tiab] OR diabetes\*[all fields] OR diabetic\*[all fields] OR diabetol\*[all fields])) OR ((insulin therap\*[tiab] OR insulintherap\*[tiab]) AND (diabet\*[tiab] OR diabetes\*[all fields] OR

diabetic\*[all fields] OR diabetol\*[all fields])) OR ((insulin treat\*[tiab] OR insulintreat\*[tiab]) AND (diabet\*[tiab] OR diabetes\*[all fields] OR diabetic\*[all fields] OR diabetol\*[all fields])) OR ((intensive insulin\*[tiab] OR insulin intens\*[tiab] OR insulinintens\*[tiab]) AND (diabet\*[tiab] OR diabetes\*[all fields] OR diabetic\*[all fields] OR diabetol\*[all fields])) OR insulin replac\*[tiab] OR (brittle\*[tiab] AND diabet\*[tiab]) OR (juvenil\*[tiab] AND diabet\*[tiab]) OR (onset\*[ti] AND diabet\*[ti]) OR onset diabet\*[tiab] OR autoimmune diabet\*[tiab] OR auto-immune diabet\*[tiab]) AND english[lang]

## 2. *Web of Science search terms*

(TS=("ipilimumab\*" OR "ticilimumab\*" OR "tremelimumab\*" OR "pembrolizumab\*" OR "nivolumab\*" OR "atezolizumab\*" OR "avelumab\*" OR "durvalumab\*")) AND (TI=(("type1" OR "typeI" OR "type-1" OR "type-I" OR "type-one\*") AND "diabet\*") OR TI=("t-1-d-m\*" OR "t-I-d-m\*" OR "t-1-dm\*" OR "t-I-dm\*" OR "t1-dm\*" OR "tI-dm\*" OR "t1dm\*" OR "tIdm\*" OR "t1-d" OR "tI-d" OR "t1d" OR "tId")) OR TS=("diabet\*" OR "t-1-diabet\*" OR "t-I-diabet\*" OR "t1-diabet\*" OR "tI-diabet\*" OR "type-1-diabet\*" OR "type-I-diabet\*" OR "type-one-diabet\*" OR "type1-diabet\*" OR "typeI-diabet\*" OR "diabetes-type1\*" OR "diabetes-typeI\*" OR "diabetes-type-1\*" OR "diabetes-type-I" OR "diabetes-type-one\*" OR "diabetes-mellitus-1" OR "diabetes mellitus I" OR "diabetes-mellitus-type1\*" OR "diabetes-mellitus-typeI" OR "diabetes-mellitus-type-1\*" OR "diabetes-mellitus-type-I" OR "diabetes-mellitus-type-one\*" OR "dm-type1\*" OR "dm-typeI" OR "dm-type-1\*" OR "dm-type I" OR "dm-type-one\*") OR TI="iddm\*" OR TS=(("insulin-depend\*" OR "insulindepend\*") AND ("diabet\*" OR "diabetes\*" OR "diabetic\*" OR "diabetol\*")) OR TS=(("insulin-therap\*" OR "insulintherap\*") AND ("diabet\*"

OR "diabetes\*" OR "diabetic\*" OR "diabetol\*") OR TS=(("insulin-treat\*" OR "insulintreat\*") AND ("diabet\*" OR "diabetes\*" OR "diabetic\*" OR "diabetol\*")) OR TS=(("intensive-insulin\*" OR "insulin-intens\*" OR "insulinintens\*") AND ("diabet\*" OR "diabetes\*" OR "diabetic\*" OR "diabetol\*")) OR TS="insulin-replac\*" OR TS=("brittle\*" AND "diabet\*") OR TS=("juvenil\*" AND "diabet\*") OR TI=("onset\*" AND "diabet\*") OR TS=("onset-diabet\*" OR "autoimmune diabet\*" OR "auto-immune diabet\*")) AND LA=english

### 3. *Cochrane search terms*

((ipilimumab\* OR ticilimumab\* OR tremelimumab\* OR pembrolizumab\* OR nivolumab\* OR atezolizumab\* OR avelumab\* OR durvalumab\*):ti,ab,kw) AND (((type1 OR typeI OR (type NEXT 1) OR (type NEXT I) OR (type NEXT one\*)) AND diabet\*):ti OR ((t NEXT 1 NEXT d NEXT m\*) OR (t NEXT I NEXT d NEXT m\*) OR (t NEXT 1 NEXT dm\*) OR (t NEXT I NEXT dm\*) OR (t1 NEXT dm\*) OR (tI NEXT dm\*) OR t1dm\* OR tIdm\* OR (t1 NEXT d) OR (tI NEXT d) OR t1d OR tId):ti OR (diabet\* OR (t NEXT 1 NEXT diabet\*) OR (t NEXT I NEXT diabet\*) OR (t1 NEXT diabet\*) OR (tI NEXT diabet\*) OR (type NEXT 1 NEXT diabet\*) OR (type NEXT I NEXT diabet\*) OR (type NEXT one NEXT diabet\*) OR (type1 NEXT diabet\*) OR (typeI NEXT diabet\*) OR (diabetes NEXT type1\*) OR (diabetes NEXT typeI\*) OR (diabetes NEXT type NEXT 1\*) OR (diabetes NEXT type NEXT I) OR (diabetes NEXT type NEXT one\*) OR (diabetes NEXT mellitus NEXT 1) OR (diabetes NEXT mellitus NEXT I) OR (diabetes NEXT mellitus NEXT type1\*) OR (diabetes NEXT mellitus NEXT typeI) OR (diabetes NEXT mellitus NEXT type NEXT 1\*) OR (diabetes NEXT mellitus NEXT type NEXT I) OR (diabetes NEXT mellitus NEXT type NEXT one\*) OR (dm NEXT type1\*) OR

(dm NEXT typeI) OR (dm NEXT type NEXT 1\*) OR (dm NEXT type NEXT I) OR (dm NEXT type NEXT one\*):ti,ab,kw OR iddm\*:ti OR (((insulin NEXT depend\*) OR insulindepend\*) AND diabet\*):ti,ab,kw OR (((insulin NEXT therap\*) OR insulintherap\*) AND diabet\*):ti,ab,kw OR (((insulin NEXT treat\*) OR insulintreat\*) AND diabet\*):ti,ab,kw OR (((intensive NEXT insulin\*) OR (insulin NEXT intens\*) OR insulinintens\*) AND diabet\*):ti,ab,kw OR (insulin NEXT replac\*):ti,ab,kw OR (brittle\* AND diabet\*):ti,ab,kw OR (juvenil\* AND diabet\*):ti,ab,kw OR (onset\* AND diabet\*):ti OR ((onset NEXT diabet\*) OR (autoimmune NEXT diabet\*) OR (auto NEXT immune NEXT diabet\*)):ti,ab,kw)
